# Supplementary material for: Toxicity mechanism in fetal lung fibroblast cells for multi-walled carbon nanotubes defined by chemical impurities and dispersibility
Source: Royal Society of Chemistry journal article supplement (doi:10.1039/c5tx00211g), 2015-11-05
Supplement: c5tx00211g1.pdf [file c5tx00211g1.pdf]

**Supplementary Information**

# Toxicity Mechanism in Fetal Lung Fibroblast Cells for Multi-Walled Carbon Nanotubes defined by Chemical Impurities and Dispersibility

*Aparna Shinde<sup>2</sup>, Candace S.J. Tsai<sup>1,2\*</sup>*

<sup>1</sup> Department of Environmental and Radiological Health Science, Colorado State University, 1681  
Campus Delivery, Fort Collins, CO 80523-1681

<sup>2</sup> Birck Nanotechnology Center, Discovery Park, Purdue University, 1205 West State Street, West  
Lafayette, IN 47907, USA

**\*Corresponding author:**

Tsai, Candace S.J., e-mail: Candace.Tsai@colostate.edu, tel.: + 1-765-494-4676; fax: + 1-765-494-1377

A. Characterization of Multi-walled carbon nanotubes (MWCNTs):

MWCNTs were studied for fiber size, structure and elemental composition using TEM and Nanosight. The diameter of IG-MWCNTs was approximately 10 nm (Figure S1a) and for RG-MWCNTs was approximately 15 nm (Figure S1b). IG-MWCNTs formed agglomerates in distilled water and had reduced dispersibility (Figure S1c and S1g). RG-MWCNTs formed large agglomerates in which the individual fibers extended from the agglomerates before sonication and dispersed more uniformly after sonication

(Figure S1d and S1g). We used Energy Dispersive X-ray spectroscopy (EDX) analysis with TEM to analyze the elemental composition of MWCNTs. TEM EDX spectra of IG-MWCNTs EDX spectra revealed presence of carbon, oxygen and molybdenum (Figure S1e) whereas RG-MWCNT agglomerates (Figure S1f) contained carbon, oxygen, molybdenum and sulfur. IG-MWCNT aggregates were found to be deficient in sulfur. Figure S1g illustrates the dispersion of IG-MWCNTs and RG-MWCNTs in distilled water before sonication. Figure S1h shows the size distribution of RG-MWCNTs' and IG-MWCNTs' agglomerates in distilled water (Figure S1h). The concentration of nanometer-sized particles in distilled water was found to be zero.

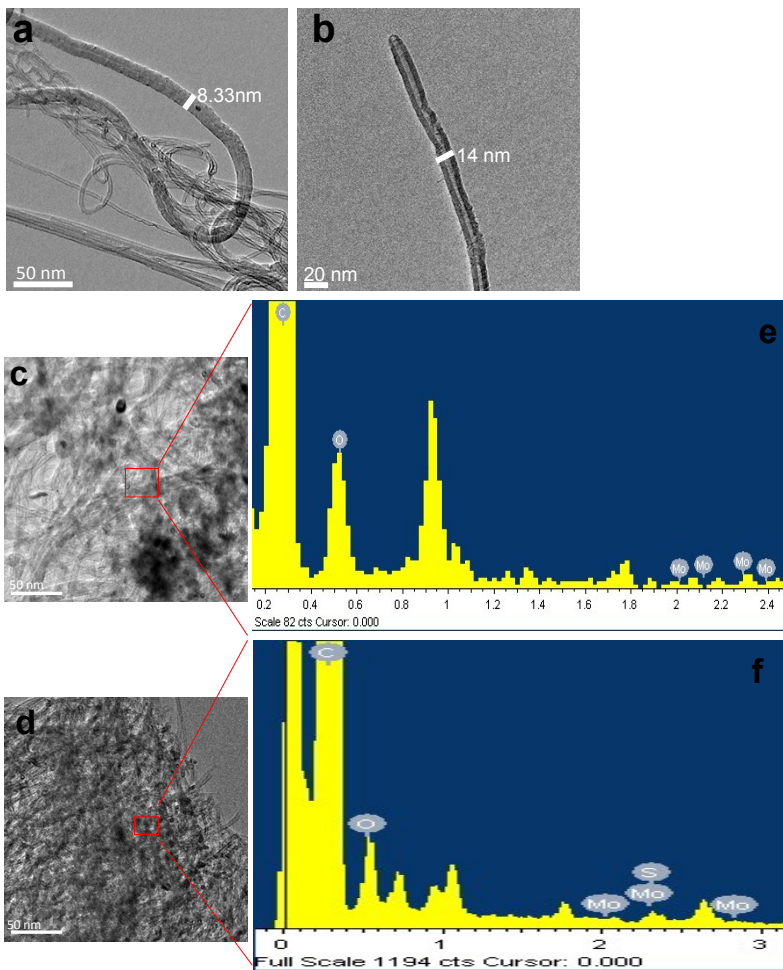

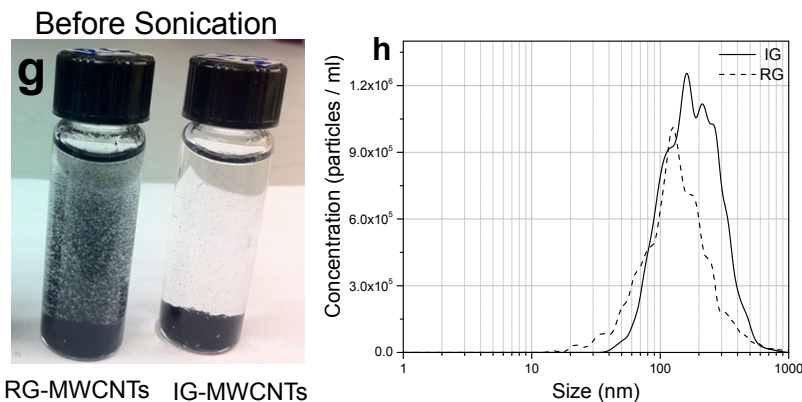

Figure S1. Characterization of MWCNTs. Standard scale bar: 50 nm. (a ) TEM micrograph for IG-MWCNTs displaying single nanotube, (b) TEM micrograph for RG-MWCNTs displaying single nanotube (c & e) illustrates the image and EDX spectra respectively for IG-MWCNTs. (d & f) illustrates the image and EDX spectra respectively for RG-MWCNTs. (e) Dispersion of 1mg/ml of MWCNTs (IG-MWCNTs and RG-MWCNTs) in water before sonication. (f) Size distribution analysis of IG-MWCNTs and RG-MWCNTs in water using Malvern Nanosight™ LM10. Further, in Table 1 we have listed the elemental and impurities composition in percentage for both IG-MWCNTs and RG-MWCNTs.

#### B. Elemental Composition Analysis using X-ray Photoelectron Spectroscopy (XPS):

XPS analysis was performed to confirm the difference in the elemental composition of two types of MWCNTs. We have shown comparative XPS spectrum of C1s and O1s between IG-MWCNTs and RG-MWCNTs in Figure S2. The C1s core peak levels of carbon atoms for both IG-MWCNTs and RG-MWCNTs was observed at approximately 284.5 eV. Three C1s peaks respectively located at 284.5, 285 and 286.5 eV were seen in the C1s XPS spectra (Figure S2a) for both IG-MWCNTs and RG-MWCNTs. The peak at 284.5 and 285 eV were attributed to sp<sup>2</sup> hybridized and sp<sup>3</sup> hybridized graphitic carbon atom. The peak located at 286.5 eV was bestowed by carbon atoms from carbonyl (C=O) species. The satellite shake up peak ( $\pi$ - $\pi^*$ ) was observed at 291.1 eV. The peak at 287.7 for carboxyl (C=O) was almost invisible due to negligible concentrations. Oxygen binding energy O1s was deconvulated into two peaks at 532.3 and 532.8 eV, which could be labelled as C-OH and C=O respectively (Figure S2b). O1s peak area and

height observed in IG-MWCNTs was comparatively lesser than peak area and height of RG-MWCNTs.

Further, the peak 532.1 was more shifted to left at 531.7 as compared to RG-MWCNTs.

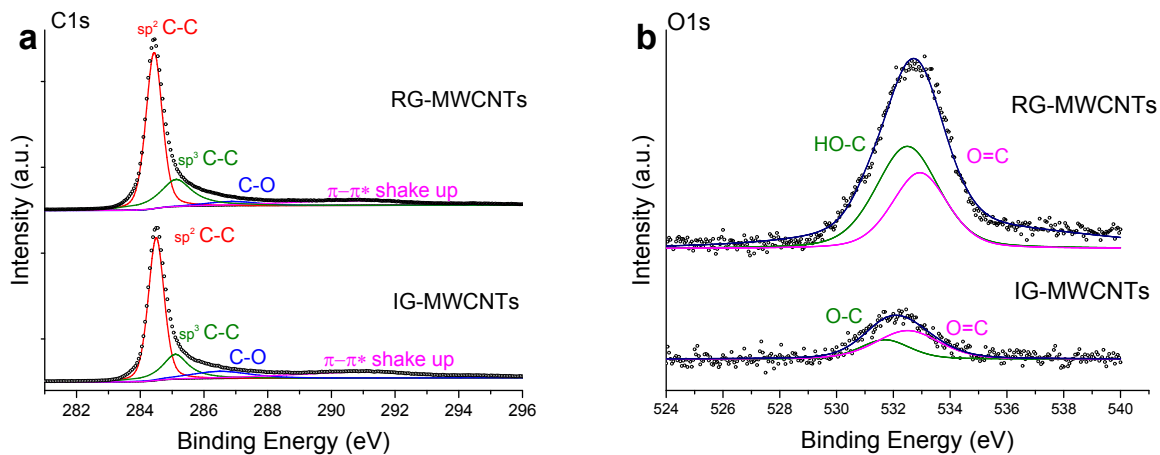

Figure S2. Comparative XPS spectra for IG-MWCNTs and RG-MWCNTs of (a) C1s and (b) O1s. Note the difference in the peak area between IG-MWCNTs and RG-MWCNTs in O1s spectra.

|         | IG-MWCNTs  | RG-MWCNTs  |
|---------|------------|------------|
| Element | Weight (%) | Weight (%) |
| C       | 96.19      | 99.97      |
| O       | 2.88       | 1.54       |
| Mo      | 0.93       | 0.43       |
| S       |            | 0.06       |
|         | 100        | 100        |

Table S1: Elemental Composition of IG-MWCNTs and RG-MWCNTs following analysis using TEM EDX.
